# Supplementary material
Source: PubMed Central journal article supplement (PMC8478451)
Supplement: aem.01375-21-s0001.pdf [file aem.01375-21-s0001.pdf]

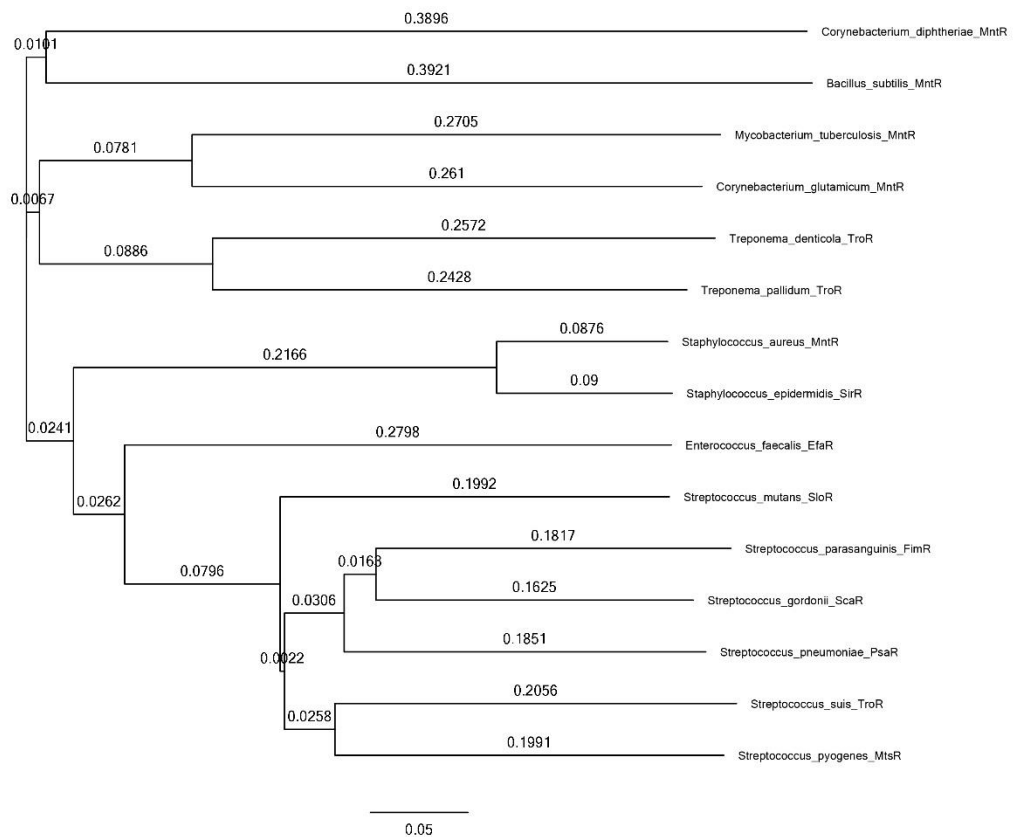

**FIG S1** Phylogenetic analysis of the DtxR family metalloregulators. Protein sequences were aligned using Clustal Omega, and the generated phylogenetic tree was edited using FigTree v1.4.4. The GenBank accession numbers for the proteins are as follows: *Corynebacterium diphtheriae* MntR, WP\_010935052.1; *Bacillus subtilis* MntR, NP\_390332.2; *Mycobacterium tuberculosis* MntR, CCP45587.1; *Corynebacterium glutamicum* MntR, CAF19348.1; *Treponema denticola* TroR, WP\_002678714.1; *Treponema pallidum* TroR, WP\_010881614.1; *Staphylococcus aureus* MntR, WP\_000954654.1; *Staphylococcus epidermidis* SirR, WP\_001832139.1; *Enterococcus faecalis* EfaR, AAO80811.1; *Streptococcus mutans* SloR, WP\_002262032.1; *Streptococcus parasanguinis* FimR, WP\_014712822.1; *Streptococcus gordonii* ScaR, WP\_012130850.1; *Streptococcus pneumoniae* PsaR, WP\_000188498.1; *Streptococcus suis* TroR, WP\_012027964.1; *Streptococcus pyogenes* MtsR, WP\_011285412.1.

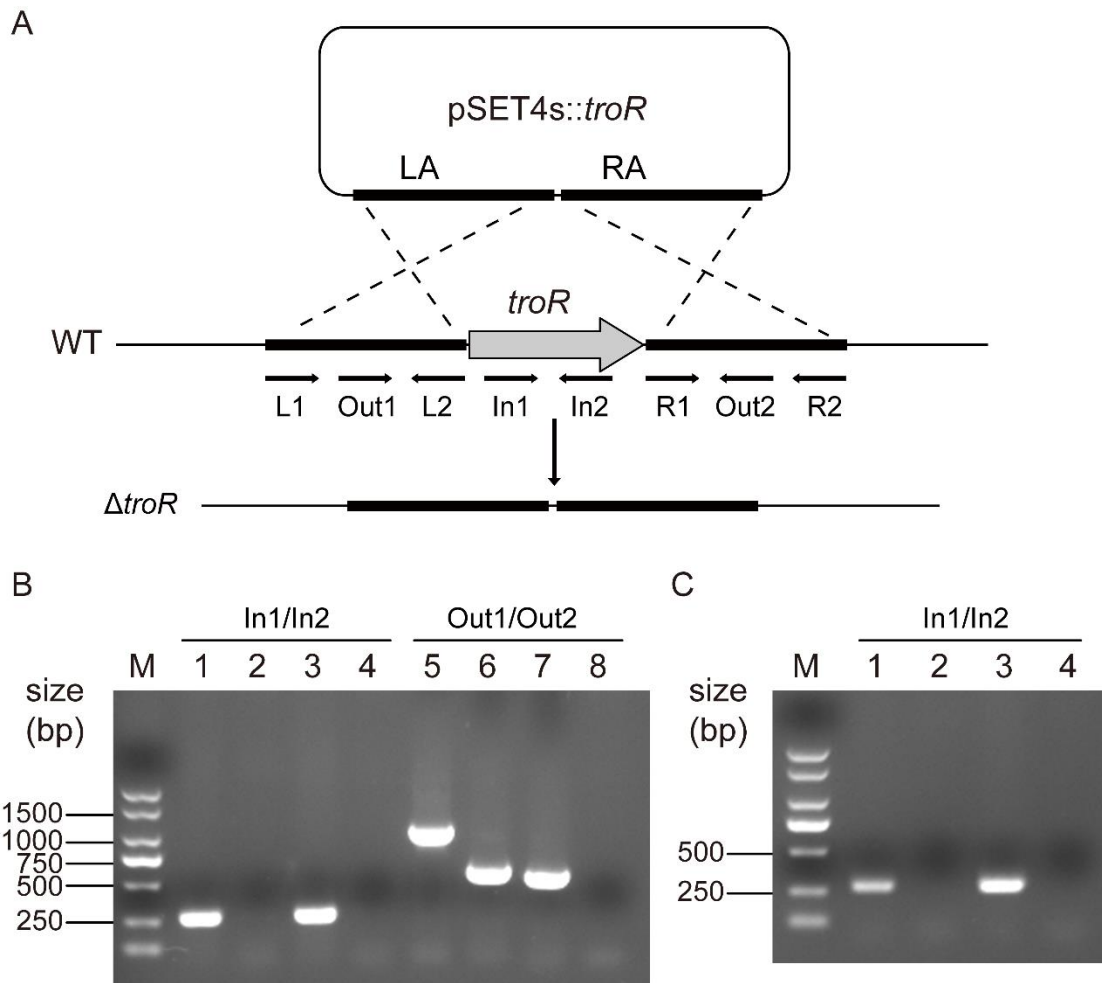

**FIG S2** Construction and identification of the mutant and complementation strains. (A) Schematic representation of *troR* deletion in *S. suis* by homologous recombination. LA and RA indicate the left and right arms of *troR*. The primers used for construction and identification of the strains are indicated under the black arrows. (B) Identification of the  $\Delta troR$  and  $C\Delta troR$  strains by PCR analysis. Genomic DNAs from the WT strain (lanes 1 and 5),  $\Delta troR$  (lanes 2 and 6),  $C\Delta troR$  (lanes 3 and 7) were used as the templates. PCR amplification with water as the templates served as the negative control (lanes 4 and 8). The primer pairs are indicated above the lanes. (C) Identification of the  $\Delta troR$  and  $C\Delta troR$  strains by reverse transcription PCR analysis. Total RNAs were isolated from the WT strain (lane 1),  $\Delta troR$  (lanes 2),  $C\Delta troR$  (lanes 3). cDNAs generated from these RNAs and water (lane 4) were used as the templates for PCR amplification. The primer pair is indicated above the lanes.

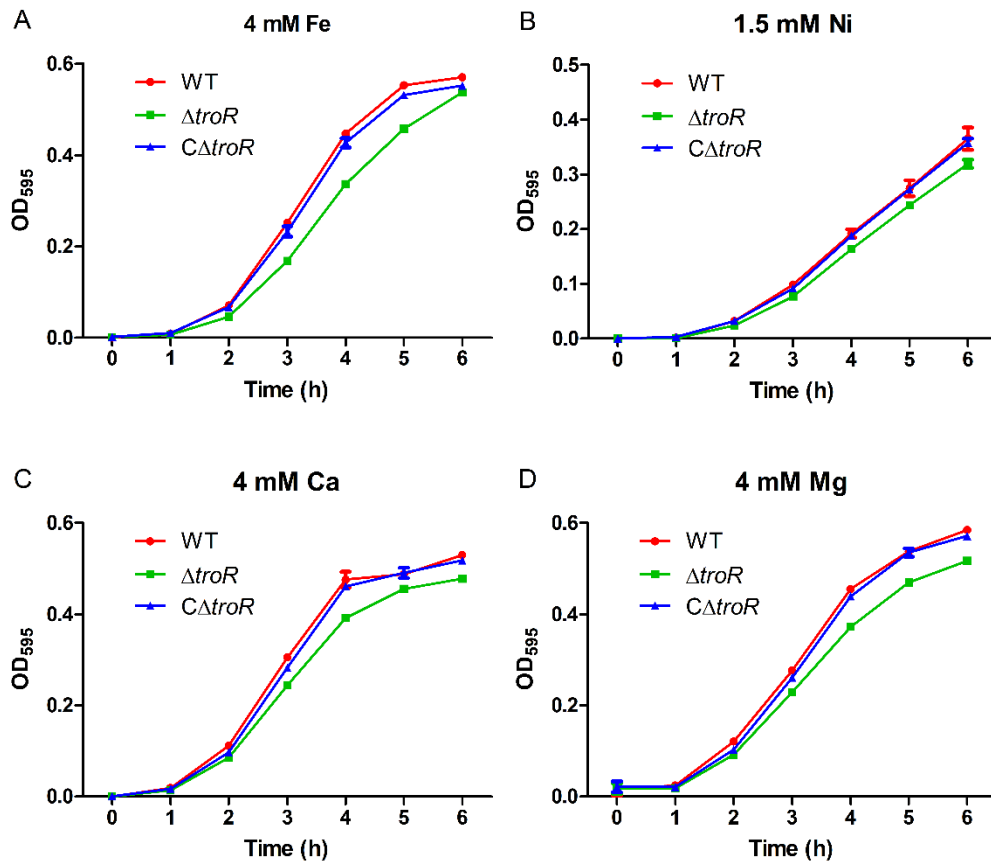

**FIG S3** Growth curves of the *S. suis* strains in the presence of various metals. The WT,  $\Delta troR$ , and  $C\Delta troR$  strains were grown in TSBS medium supplemented with 4 mM Fe(II) (A), 1.5 mM Ni (B), 4 mM Ca (C), or 4 mM Ca (D). The strains were grown in 96-well plates (200  $\mu$ l per well) at 37°C with linear shaking, and the OD<sub>595</sub> values were measured hourly. At least three independent experiments were performed; the data shown are the means  $\pm$  SDs from three wells in a representative experiment.

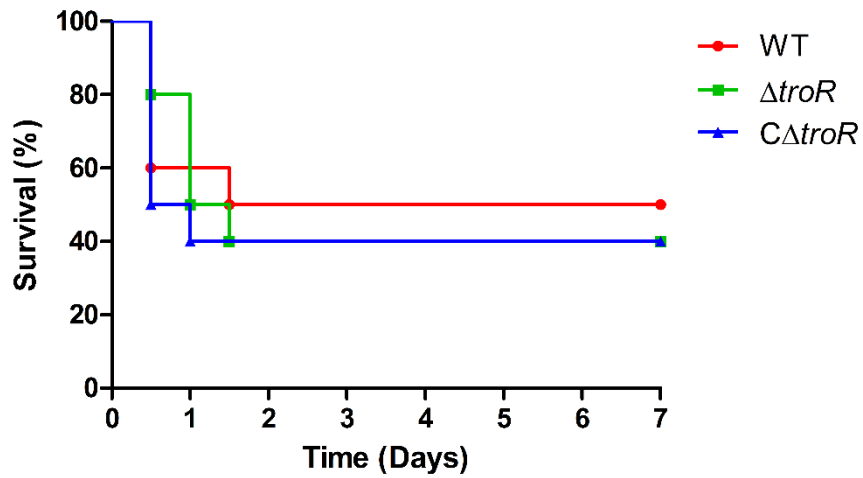

**FIG S4** TroR plays no significant role in *S. suis* virulence in a mouse model of intraperitoneal infection. Four groups of BALB/c mice (10 mice per group) were inoculated by intraperitoneal injection of  $3 \times 10^8$  CFU of the WT,  $\Delta troR$ , and  $C\Delta troR$  strains or PBS. There was no significant difference in the survival rates between the  $\Delta troR$  and WT groups, and between the  $\Delta troR$  and  $C\Delta troR$  groups.

**TABLE S1** Summary of the differentially expressed genes in the presence of Mn

| Gene_id         | readcount_Mn | readcount_Nor | log2FoldChange | padj       | description                                        |
|-----------------|--------------|---------------|----------------|------------|----------------------------------------------------|
| SSUSC84_RS03545 | 22.91230729  | 7.567272577   | 1.5983         | 0.019904   | ECF transporter S component                        |
| SSUSC84_RS05785 | 54.5831151   | 19.08210212   | 1.5162         | 0.0008366  | hypothetical protein                               |
| SSUSC84_RS03540 | 21.88103251  | 7.831805213   | 1.4823         | 0.038228   | uridine phosphorylase                              |
| SSUSC84_RS08590 | 33.49920665  | 12.26981481   | 1.449          | 0.0087933  | hypothetical protein                               |
| SSUSC84_RS03550 | 30.71983556  | 11.74074954   | 1.3876         | 0.014494   | EcfT                                               |
| SSUSC84_RS00965 | 63.38655466  | 25.14150482   | 1.3341         | 0.00035661 | sugar ABC transporter permease                     |
| SSUSC84_RS03175 | 35.74213899  | 14.22428697   | 1.3293         | 0.011557   | ComEC/Rec2                                         |
| SSUSC84_RS10505 | 608.5943275  | 257.9754549   | 1.2382         | 6.67E-16   | dihydrofolate reductase                            |
| SSUSC84_RS06145 | 245.4937476  | 109.1929148   | 1.1688         | 0.0058626  | Nif3-like dinuclear metal center hexameric protein |
| SSUSC84_RS05780 | 89.17298939  | 39.6949737    | 1.1677         | 0.030825   | sugar kinase                                       |
| SSUSC84_RS02230 | 82.11512868  | 37.25648899   | 1.1402         | 0.0030723  | PTS mannose-transporter subunit IIB                |
| SSUSC84_RS04795 | 188.5688366  | 85.56864291   | 1.1399         | 0.00092969 | septum formation inhibitor Maf                     |
| SSUSC84_RS06975 | 52.35333565  | 24.24778205   | 1.1104         | 0.010782   | lipoprotein                                        |
| SSUSC84_RS05500 | 31.79111109  | 14.95973792   | 1.0875         | 0.035848   | 2-dehydro-3-deoxy-phosphogluconate aldolase        |
| SSUSC84_RS07855 | 2845.964211  | 1358.301965   | 1.0671         | 9.23E-07   | pyruvate formate lyase-activating protein          |
| SSUSC84_RS00740 | 67.45636828  | 32.84235314   | 1.0384         | 0.008147   | copper chaperone                                   |
| SSUSC84_RS09795 | 1381.401219  | 3959.403523   | -1.5192        | 4.59E-36   | metal-dependent transcriptional regulator          |
| SSUSC84_RS00190 | 9.405353762  | 31.40564853   | -1.7395        | 0.0016464  | rod shape-determining protein MreD                 |

|                 |             |             |         |           |                                           |
|-----------------|-------------|-------------|---------|-----------|-------------------------------------------|
| SSUSC84_RS09305 | 135.4763964 | 646.74505   | -2.2552 | 0.0040645 | serine protease                           |
| SSUSC84_RS09770 | 634.8004027 | 3251.532107 | -2.3567 | 5.62E-13  | metal ABC transporter permease            |
| SSUSC84_RS09775 | 598.5300396 | 4389.008315 | -2.8744 | 5.21E-19  | metal ABC transporter permease            |
| SSUSC84_RS09780 | 872.6690645 | 7759.371472 | -3.1524 | 2.77E-34  | metal ABC transporter ATP-binding protein |
| SSUSC84_RS10665 | 4.740852848 | 56.09441512 | -3.5646 | 1.81E-13  | hypothetical protein                      |
| SSUSC84_RS09785 | 184.6791045 | 2696.747449 | -3.8681 | 2.82E-49  | hypothetical protein                      |
| SSUSC84_RS09790 | 450.1269953 | 13077.50139 | -4.8606 | 3.71E-209 | metal transporter                         |

---

**TABLE S2** Primers used in this study

| Primer | Sequence (5'-3') <sup>a</sup>           | Size (bp) | Target gene                       |
|--------|-----------------------------------------|-----------|-----------------------------------|
| L1     | <b>CGGGATCC</b> ACAAGGGAATTGAAAACCAG    | 621       | The left arm of <i>troR</i>       |
| L2     | TGTACTGGATGCTCTGCGATGAGTTTATTGGT        |           |                                   |
| R1     | ATCGCAGAGCATCCAGTACAAGGACAAAGAG         | 636       | The right arm of <i>troR</i>      |
| R2     | <b>CGGAATTC</b> GTCACTTTATCACAGGGGCT    |           |                                   |
| In1    | TGCCAAGGCAGGTTATCTC                     | 269       | An internal region of <i>troR</i> |
| In2    | GCCGTGTCTGGTAGCGTT                      |           |                                   |
| Out1   | AGCCTTCTGTGGTTTGCG                      | 1089/601  | A fragment containing <i>troR</i> |
| Out2   | GATGACCTGGGGTATGCG                      |           |                                   |
| C1     | <b>CGGGATCC</b> AACCCTATTAGGGACAATAGCAG | 835       | <i>troR</i> and its promoter      |
| C2     | <b>CGGAATTC</b> TTAGGCTGGGCGATTGC       |           |                                   |
| QtroA1 | TGGCTACATACAAATGAGGGTCTT                | 150       | An internal region of <i>troA</i> |
| QtroA2 | GTCCATCGCAAACCACAGAAG                   |           |                                   |
| Q16S1  | TAGTCCACGCCGTAACGATG                    | 159       | An internal region of 16S rRNA    |
| Q16S2  | TAAACCACATGCTCCACCGC                    |           |                                   |

<sup>a</sup> The bold sequences are restriction sites.
